# Supplementary material for: MicroRNA519d and microRNA4758 can identify gangliogliomas from dysembryoplastic neuroepithelial tumours and astrocytomas
Source: PubMed Central journal article supplement (PMC6021349; doi:10.18632/oncotarget.25563), 2018-06-15
Supplement: oncotarget-09-28103-s001.pdf [file oncotarget-09-28103-s001.pdf]

## MicroRNA519d and microRNA4758 can identify gangliogliomas from dysembryoplastic neuroepithelial tumours and astrocytomas

### SUPPLEMENTARY MATERIALS

Supplementary Table 1: Primer sequences for quantitative real-time PCR

| Gene                          | Sequence (5'-3')                                       |
|-------------------------------|--------------------------------------------------------|
| <i>TIMP2</i>                  | TGCAGATGTAGTGATCAGGGC<br>TCTCAGGCCCTTTGAACATC          |
| <i>AKT3</i>                   | ATTATTGCAAAGGATGAAGTGGC<br>CGGTCTTTTGTCTGGAAGGA        |
| <i>ERBB3</i>                  | GAGAGACCCTCACTGCTG<br>GATGGTACATGACAAGGTGC             |
| <i>ERBB4</i>                  | AGGAGTGAAATTGGACACAGC<br>TCTCGGTATACAACTGGTTTCC        |
| <i>p21 (CDKN1A)</i>           | CCTCCCCCTTGCCTTTC<br>GTGGGACAGGCACCTCAG                |
| <i>p27 (CDKN1B)</i>           | CCGGCTAACTCTGAGGACAC<br>TTGCAGGTCGCTTCTTATT            |
| <i>JAK1</i>                   | GCATGAATAACATTTAAATTCCACA<br>TGACTTTTTGGACAGAACACAAAAC |
| <i>PTEN</i>                   | CTGCGCTCAGTTCTCTCCTC<br>GCGGCTCAACTCTCAAACCTT          |
| <i>PI3KCA</i>                 | TTGTGACCTTCGGCTTTTTTC<br>CGGTTGCCTACTGGTTCAAT          |
| <i>TP53</i>                   | TGGACGGTGGCTCTAGACTT<br>CTCCCATGTGCTCAAGACTG           |
| <i>MDM2</i>                   | CATTGTCCATGGCAAAACAG<br>GGCAGGGCTTATTCTTTTC            |
| <i>CDK4</i>                   | GGTACCACCGACTGCACTG<br>GATGACTGGCCTCGAGATGT            |
| <i>RB1</i>                    | CAAAGCAGAAGGCAACTTGA<br>GGGATTCCATGATTCGATGT           |
| <i>CDK2</i>                   | TCCTCCACCGAGACCTTAAA<br>CAGGGACTCCAAAAGCTCTG           |
| <i>EF1<math>\alpha</math></i> | ATCCACCTTTGGGTGCGCTTT<br>CCGCAACTGTCTGTCTCATATCAC      |
